# Supplementary material for: The impact of left ventricular geometry on left atrium phasic function in obstructive sleep apnea syndrome: a multimodal echocardiography investigation
Source: Springer Nature journal article supplement (doi:10.1186/s12872-021-02018-1), 2021-04-24
Supplement: MOESM2 [file 19101974]

# CERTIFICATE OF ENGLISH EDITING

This document certifies that the paper listed below has been edited to ensure that the language is clear and free of errors. The edit was performed by professional editors at Editage, a division of Cactus Communications. The intent of the author's message was not altered in any way during the editing process. The quality of the edit has been guaranteed, with the assumption that our suggested changes have been accepted and have not been further altered without the knowledge of our editors.

## TITLE OF THE PAPER

The impact of left ventricular geometry on left atrium phasic function in obstructive sleep apnea syndrome: A multimodal echocardiography investigation

## AUTHORS

Yong Zhang et al

## JOB CODE

IYBIO\_603

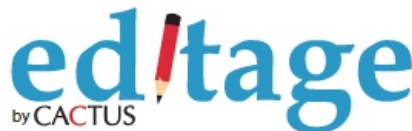

Signature

*Vikas Narang*

Vikas Narang,  
Chief Operating Officer,  
Editage

Date of Issue  
**March 27, 2021**

Editage, a brand of Cactus Communications, offers professional English language editing and publication support services to authors engaged in over 500 areas of research. Through its community of experienced editors, which includes doctors, engineers, published scientists, and researchers with peer review experience, Editage has successfully helped authors get published in internationally reputed journals. Authors who work with Editage are guaranteed excellent language quality and timely delivery.

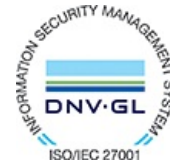

**CACTUS**

### Contact Editage

#### Worldwide

request@editage.com  
+1(833)979-0061  
www.editage.com

#### Japan

submissions@editage.com  
+81 0120-50-2987  
www.editage.jp

#### Korea

submit-  
korea@editage.com  
02-3478-4396  
www.editage.co.kr

#### China

fabiao@editage.cn  
400-005-6055  
www.editage.cn

#### Brazil

contato@editage.com  
+5508000474773  
www.editage.com.br
